# Supplementary material
Source: MDPI journal article supplement (https://www.mdpi.com/1424-8247/15/4/458)
Supplement: s1 [file s1]

## SUPPLEMENTARY MATERIALS

# Structure-Activity Relationship investigations of novel constrained chimeric peptidomimetics of SOCS3 protein targeting JAK2

Sara La Manna<sup>1</sup>, Marilisa Leone<sup>2</sup>, Flavia Anna Mercurio<sup>2</sup>, Daniele Florio<sup>1</sup> and Daniela Marasco<sup>1,\*</sup>

<sup>1</sup> Department of Pharmacy, CIRPEB: Research Center on Bioactive Peptides- University of Naples "Federico II", 80131, Naples, Italy; [sara.lamanna@unina.it](mailto:sara.lamanna@unina.it), [daniele.florio@unina.it](mailto:daniele.florio@unina.it), [daniela.marasco@unina.it](mailto:daniela.marasco@unina.it)

<sup>2</sup> Institute of Biostructures and Bioimaging (CNR), Naples, Italy; [marilisa.leone@cnr.it](mailto:marilisa.leone@cnr.it), [flaviaanna.mercurio@cnr.it](mailto:flaviaanna.mercurio@cnr.it)

### Table of contents:

**Figure S1.** 1D [<sup>1</sup>H] and 2D [<sup>1</sup>H-<sup>1</sup>H] NOESY 300 spectra of KIRCONG *i/i+5* in H<sub>2</sub>O/TFE 85/15 v/v and in H<sub>2</sub>O/TFE 60/40 v/v.

**Figure S2.** 2D [<sup>1</sup>H-<sup>1</sup>H] TOCSY and NOESY 300 spectra of KIRCONG *i/i+7* in H<sub>2</sub>O/TFE 60/40 v/v.

**Figure S3.** NMR structures of KIRCONG *i/i+7* in H<sub>2</sub>O/TFE (60/40 v/v) and KIRCONG chim in H<sub>2</sub>O/TFE (60/40, v/v).

**Figure S4.** Capillary shape and capillary scan of designed analogues.

**Figure S5.** Binding isotherms for MST signals versus linear KIRCONG *i/i+5* concentrations.

**Table S1.** Deconvolution of CD spectra.

**Table S2.** <sup>1</sup>H chemical shifts of KIRCONG *i/i+5* in H<sub>2</sub>O/TFE (60/40, v/v).

**Table S3.** <sup>1</sup>H chemical shifts of KIRCONG *i/i+5* in H<sub>2</sub>O/TFE (85/15, v/v).

**Table S4.** <sup>1</sup>H chemical shifts of KIRCONG *i/i+7* in H<sub>2</sub>O/TFE (60/40, v/v).

**Table S5.** Structure statistics of KIRCONG *i/i+7* NMR conformers in H<sub>2</sub>O/TFE (60/40, v/v).

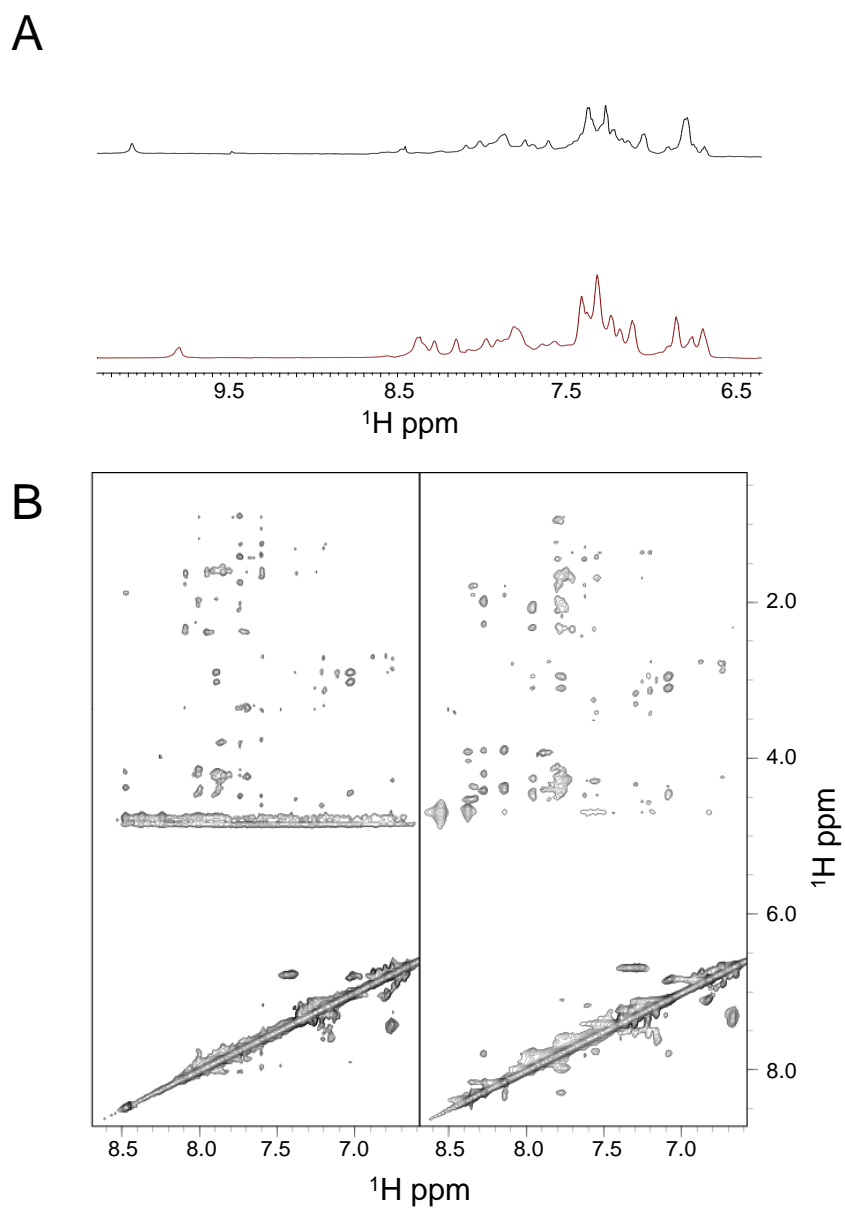

**Figure S1.** (A) Comparison of 1D  $^1\text{H}$  spectra of KIRCONG  $i/i+5$  in  $\text{H}_2\text{O}/\text{TFE}$  85/15 v/v (black) and KIRCONG  $i/i+5$  in  $\text{H}_2\text{O}/\text{TFE}$  (60/40 v/v) (red). Spectral regions containing peaks from  $\text{H}_\text{N}$  and aromatic protons are shown. (B) 2D  $^1\text{H}$ - $^1\text{H}$  NOESY 300 spectra of KIRCONG  $i/i+5$  in  $\text{H}_2\text{O}/\text{TFE}$  85/15 v/v (left panel) and KIRCONG  $i/i+5$  in  $\text{H}_2\text{O}/\text{TFE}$  60/40 v/v (right). The figure shows spectral regions containing correlations involving  $\text{H}_\text{N}$ , aromatic and aliphatic protons.

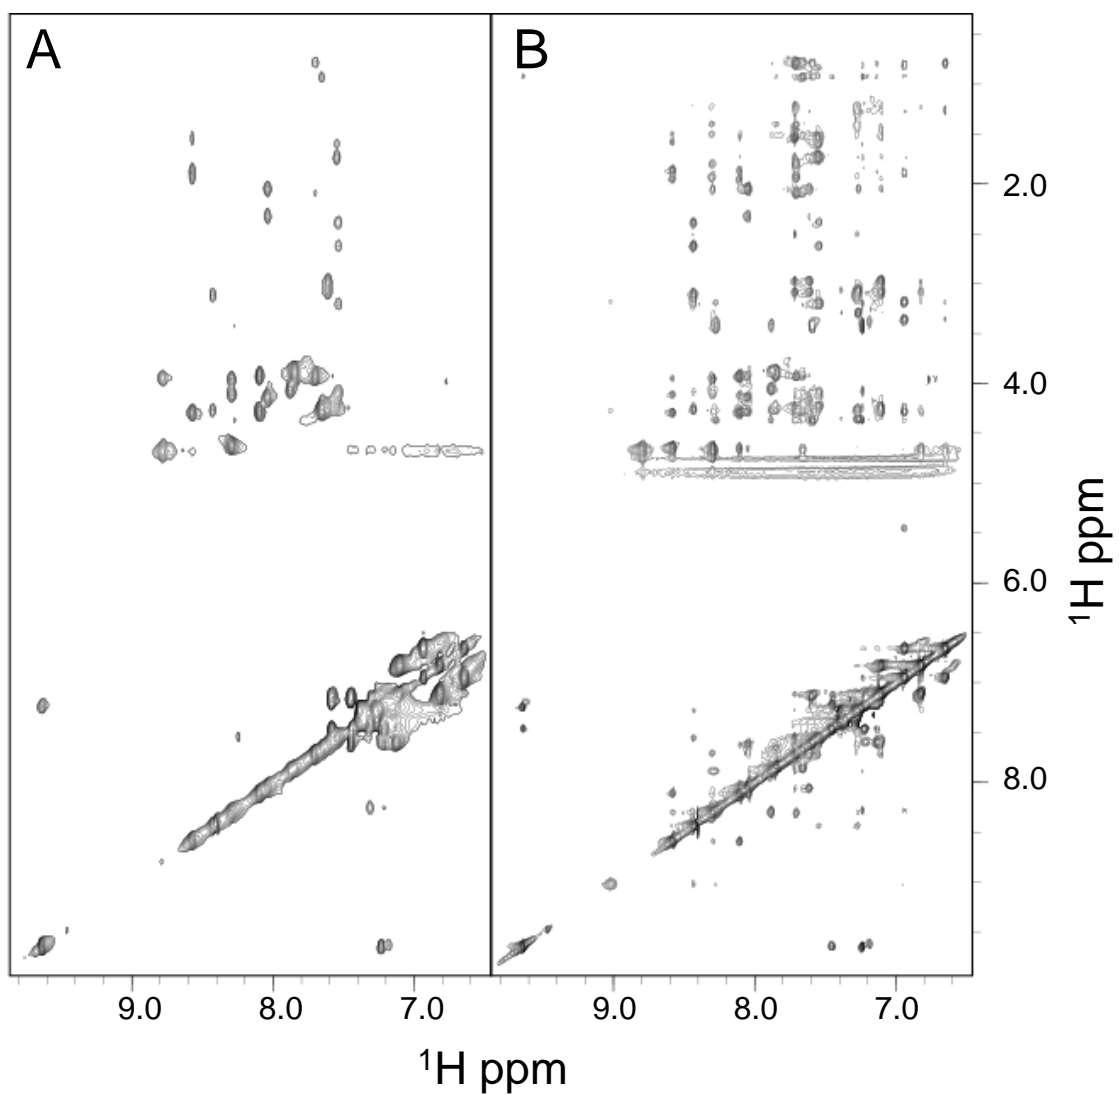

**Figure S2.** 2D [ $^1\text{H}$ - $^1\text{H}$ ] TOCSY (A) and NOESY 300 (B) spectra of KIRCONG *i/i+7* in  $\text{H}_2\text{O}/\text{TFE}$  60/40 v/v. The figure shows spectral regions containing correlations involving  $\text{H}_\text{N}$ , aromatic and aliphatic protons.

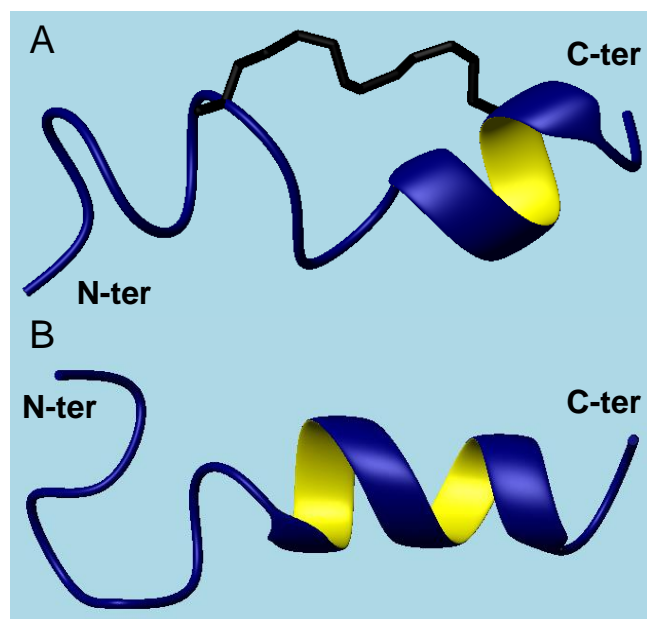

**Figure S3.** NMR structures (conformers n. 1) of KIRCONG *i/i+7* in H<sub>2</sub>O/TFE (60/40, v/v) (A), and KIRCONG chim in H<sub>2</sub>O/TFE (60/40, v/v) (B).

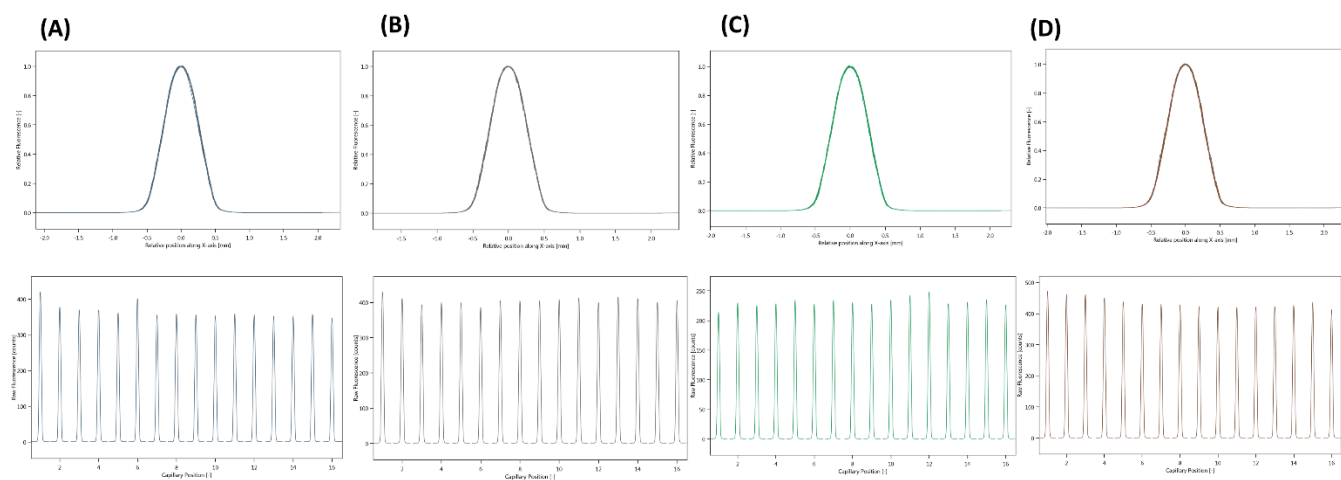

**Figure S4.** Upper: capillary shape and lower: capillary scan of: (A) KIRCONG *amide*, (B) KIRCONG *disulfide*, (C) KIRCONG *i/i+5* and (D) KIRCONG *i/i+7*.

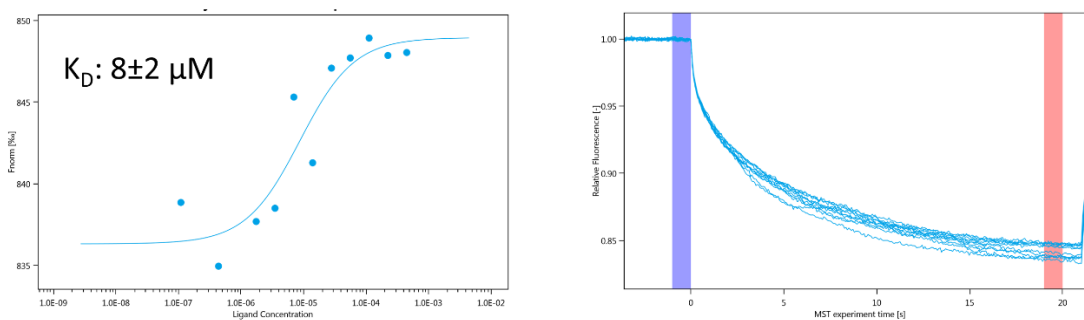

**Figure S5.** Binding isotherms for MST signals versus linear KIRCONG *i/i+5* concentrations.

**Table S1.** Deconvolution of CD spectra.

|                                     | %TFE | HELIX | BETA | TURN | OTHERS |
|-------------------------------------|------|-------|------|------|--------|
| <b>KIRCONG<br/><i>amide</i></b>     | 15   | 0     | 42.0 | 12.7 | 45.4   |
|                                     | 25   | 0     | 41.5 | 13.6 | 44.9   |
|                                     | 45   | 1.3   | 39.7 | 14.9 | 44.1   |
|                                     | 65   | 8.3   | 31.8 | 14.5 | 45.4   |
| <b>KIRCONG<br/><i>disulfide</i></b> | 15   | 0.6   | 43.8 | 12.9 | 42.7   |
|                                     | 25   | 0     | 42.6 | 13.6 | 43.8   |
|                                     | 45   | 9.8   | 35.0 | 13.4 | 41.8   |
|                                     | 65   | 8.3   | 34.7 | 13.4 | 43.6   |
| <b>KIRCONG<br/><i>i/i+5</i></b>     | 15   | 8.2   | 37.4 | 13.6 | 40.8   |
|                                     | 25   | 6.1   | 37.5 | 13.9 | 42.4   |
|                                     | 45   | 22.6  | 21.0 | 13.3 | 43.1   |
|                                     | 65   | 41.5  | 16.8 | 9.9  | 31.7   |
| <b>KIRCONG<br/><i>i/i+7</i></b>     | 15   | 3.8   | 43.7 | 13.6 | 39     |
|                                     | 25   | 12.1  | 31.8 | 13.5 | 42.7   |
|                                     | 45   | 24.4  | 23.5 | 13.4 | 38.7   |

**Table S2.**  $^1\text{H}$  chemical shifts of KIRCONG *i/i+5* in  $\text{H}_2\text{O}/\text{TFE}$  (60/40, v/v), pH 4.52, and  $T=25^\circ$ . In red tentative assignments are reported. The  $\beta$ -Alanine and (S)-N- 2-(4'-pentenyl) alanine are indicated as "BAL" and "X", respectively. N.D. stands for not determined.

| Residue | HN   | H $\alpha$ | H $\beta$                            | H $\gamma$ | Others                                                                                                                     |
|---------|------|------------|--------------------------------------|------------|----------------------------------------------------------------------------------------------------------------------------|
| 1F      | N.D. | 4,34       | 3,17-3,30                            |            | $\delta$ 7,30<br>$\epsilon$ 7,40                                                                                           |
| 2S      | 8,55 | 4,64       | 3,90-3,94                            |            |                                                                                                                            |
| 3S      | 8,38 | 4,52       | 3,92-4,02                            |            |                                                                                                                            |
| 4K      | 8,34 | 4,36       | 1,79-1,91                            | 1,50       | $\delta$ 1,72<br>$\epsilon$ 3,01                                                                                           |
| 5S      | 8,15 | 4,42       | 3,89-3,91                            |            |                                                                                                                            |
| 6E      | 8,28 | 4,21       | 1,96-2,01                            | 2,29       |                                                                                                                            |
| 7Y      | 7,78 | 4,50       | 2,95-3,10                            |            | $\delta$ 7,09<br>$\epsilon$ 6,83                                                                                           |
| 8Q      | 7,97 | 4,26       | 2,06-2,11                            | 2,34       | $\epsilon$ 6,68-7,31                                                                                                       |
| 9L      | 7,75 | 4,31       | 1,59-1,66                            | 1,65       | 0,87-0,92                                                                                                                  |
| 10BAL   | 7,57 | 2,35       | 3,28-3,51                            |            |                                                                                                                            |
| 11X     | 7,70 |            | $\beta\text{CH}_3$ 1,36<br>1,70-1,77 | 1,36       | $\delta$ 1,69–1,78<br>H $\epsilon$ 5,26                                                                                    |
| 12F     | 7,86 | 4,56       | 2,76-2,82                            |            | $\delta$ 7,22<br>$\epsilon$ 7,26                                                                                           |
| 13Y     | 8,10 | 4,23       | 2,80-2,88                            |            | $\delta$ 6,74<br>$\epsilon$ 6,90                                                                                           |
| 14W     | 7,53 | 4,55       | 2,95-3,03                            |            | H $\epsilon$ 1 9,80<br>H $\delta$ 1 7,21<br>H $\eta$ 2 7,29<br>H $\epsilon$ 3 7,61<br>H $\zeta$ 3 7,17<br>H $\zeta$ 2 7,31 |
| 15S     | 7,85 | 4,47       | 3,94                                 |            |                                                                                                                            |
| 16X     | 7,63 |            | $\beta\text{CH}_3$ 1,46<br>1,78-1,94 | 1,33       | $\delta$ 1,77–1,92<br>H $\epsilon$ 5,40                                                                                    |
| 17V     | 7,80 | 4,10       | 2,09                                 | 0,97-1,01  |                                                                                                                            |
| 18T     | 7,83 | 4,36       | 4,38                                 | 1,24       |                                                                                                                            |
| 19G     | 7,90 | 3,93       |                                      |            |                                                                                                                            |

**Table S3.** <sup>1</sup>H chemical shifts of KIRCONG *i/i+5* in H<sub>2</sub>O/TFE (85/15, v/v), pH 6.84, and T=25°. In red tentative assignments are reported. "BAL" and "X" are used for β-Alanine and (S)-N- 2-(4'-pentenyl) alanine, respectively. N.D. stands for not determined.

| <b>Residue</b> | <b>HN</b> | <b>H<math>\alpha</math></b> | <b>H<math>\beta</math></b>                | <b>H<math>\gamma</math></b> | <b>Others</b>                                                                                                               |
|----------------|-----------|-----------------------------|-------------------------------------------|-----------------------------|-----------------------------------------------------------------------------------------------------------------------------|
| <b>1F</b>      | N.D.      | 4,34                        | 3,17-3,30                                 |                             | $\delta$ 7,13<br>$\epsilon$ 7,30                                                                                            |
| <b>2S</b>      | N.D.      | 4,74                        | 3,97                                      |                             |                                                                                                                             |
| <b>3S</b>      | N.D.      | 4,56                        | 3,84                                      |                             |                                                                                                                             |
| <b>4K</b>      | 8,37      | 4,32                        | 1,75-1,86                                 | 1,41                        | $\delta$ 1,64<br>$\epsilon$ 2,96                                                                                            |
| <b>5S</b>      | 8,24      | 4,37                        | 3,83-3,87                                 |                             |                                                                                                                             |
| <b>6E</b>      | 8,47      | 4,16                        | 1,88-1,93                                 | 2,14                        |                                                                                                                             |
| <b>7Y</b>      | 7,89      | 4,44                        | 2,89-3,02                                 |                             | $\delta$ 7,03<br>$\epsilon$ 6,79                                                                                            |
| <b>8Q</b>      | 8,00      | 4,21                        | 1,96-2,02                                 | 2,27                        | $\epsilon$ 6,77-7,42                                                                                                        |
| <b>9L</b>      | 7,85      | 4,24                        | 1,54-1,61                                 | 1,58                        | 0,83-0,89                                                                                                                   |
| <b>10BAL</b>   | 7,69      | 2,38                        | 3,35                                      |                             |                                                                                                                             |
| <b>11X</b>     | 7,60      |                             | $\beta$ CH <sub>3</sub> 1,36<br>1,73      | 1,66                        | $\delta$ 1,651,78<br>H $\epsilon$ 5,27                                                                                      |
| <b>12F</b>     | 7,86      | 4,60                        | 2,69-2,72                                 |                             | $\delta$ 7,22<br>$\epsilon$ 7,34                                                                                            |
| <b>13Y</b>     | 8,10      | 4,26                        | 2,72-2,85                                 |                             | $\delta$ 6,76<br>$\epsilon$ 6,89                                                                                            |
| <b>14W</b>     | 7,59      | 4,59                        | 2,70-2,91                                 |                             | H $\epsilon$ 1 10,08<br>H $\delta$ 1 7,21<br>H $\eta$ 2 7,44<br>H $\epsilon$ 3 7,59<br>H $\zeta$ 3 7,17<br>H $\zeta$ 2 7,41 |
| <b>15S</b>     | 7,85      | 4,47                        | 3,94                                      |                             |                                                                                                                             |
| <b>16X</b>     | 7,74      |                             | $\beta$ CH <sub>3</sub> 1,40<br>1,73-1,76 | 1,07                        | $\delta$ 1,68-1,78<br>H $\epsilon$ 5,34                                                                                     |
| <b>17V</b>     | 7,75      | 4,13                        | 2,11                                      | 0,89-0,91                   |                                                                                                                             |
| <b>18T</b>     | 8,00      | 4,37                        | 4,31                                      | 1,20                        |                                                                                                                             |
| <b>19G</b>     | 7,86      | 3,79                        |                                           |                             |                                                                                                                             |

**Table S4.**  $^1\text{H}$  chemical shifts of KIRCONG  $i/i+7$  in  $\text{H}_2\text{O}/\text{TFE}$  (60/40, v/v), pH 4.65, and  $T=25^\circ\text{C}$ . “BAL”, “X” and “Z” indicate  $\beta$ -Alanine, (S)-N-2-(4'-pentenyl) alanine, and (R)-N- 2-(7'-octenyl) alanine, respectively. N.D. stands for not determined.

| <b>Residue</b> | <b>HN</b> | <b>H<math>\alpha</math></b> | <b>H<math>\beta</math></b>           | <b>H<math>\gamma</math></b> | <b>Others</b>                                                                                                                                                  |
|----------------|-----------|-----------------------------|--------------------------------------|-----------------------------|----------------------------------------------------------------------------------------------------------------------------------------------------------------|
| <b>1F</b>      | N.D.      | 4,35                        | 3,07-3,31                            |                             | $\delta$ 7,27<br>$\epsilon$ 7,39                                                                                                                               |
| <b>2S</b>      | 8,78      | 4,68                        | 3,95-3,97                            |                             |                                                                                                                                                                |
| <b>3S</b>      | 8,29      | 4,63                        | 3,96-4,11                            |                             |                                                                                                                                                                |
| <b>4K</b>      | 8,57      | 4,28                        | 1,88-1,96                            | 1,51-1,58                   | $\delta$ 1,72<br>$\epsilon$ 3,00                                                                                                                               |
| <b>5S</b>      | 8,10      | 4,29                        | 3,91-3,95                            |                             |                                                                                                                                                                |
| <b>6E</b>      | 8,04      | 4,13                        | 2,03-2,06                            | 2,32-2,35                   |                                                                                                                                                                |
| <b>7Y</b>      | 7,72      | 4,23                        | 2,98-3,08                            |                             | $\delta$ 7,40<br>$\epsilon$ 6,83                                                                                                                               |
| <b>8Z</b>      | 8,00      |                             | $\beta\text{CH}_3$ 1,54<br>1,74      | 1,22-1,45                   | $\delta$ 1.47–2.51<br>$\epsilon$ 1,93<br>$\eta$ 1.28<br>$\zeta$ 1.89<br>$\text{H}\zeta_1$ 5.45                                                                 |
| <b>9L</b>      | 7,56      | 4,24                        | 1,59-1,75                            | 1,71                        | 0,86-0,94                                                                                                                                                      |
| <b>10BAL</b>   | 7,55      | 2,39-2,62                   | 3,19-4,10                            |                             |                                                                                                                                                                |
| <b>11F</b>     | 8,44      | 4,27                        | 3,12                                 |                             | $\delta$ 7,27<br>$\epsilon$ 7,38                                                                                                                               |
| <b>12Y</b>     | N.D.      | 4,28                        | 3,18-3,36                            |                             | $\delta$ 6,94<br>$\epsilon$ 6,66                                                                                                                               |
| <b>13W</b>     | 8,27      | 4,36                        | 3,41-3,46                            |                             | $\text{H}\epsilon_1$ 9,63<br>$\text{H}\delta_1$ 7,25<br>$\text{H}\eta_2$ 7,21<br>$\text{H}\epsilon_3$ 7,58<br>$\text{H}\zeta_3$ 7,13<br>$\text{H}\zeta_2$ 7,45 |
| <b>14S</b>     | 7,88      | 4,07                        | 3,87                                 |                             |                                                                                                                                                                |
| <b>15X</b>     | 8,31      |                             | $\beta\text{CH}_3$ 1,41<br>1,80-1,93 | 1,24-1,51                   | $\delta$ 1,87–2,10<br>$\text{H}\epsilon$ 5,37                                                                                                                  |
| <b>16V</b>     | 7,70      | 3,93                        | 2,09                                 | 0,79-0,82                   |                                                                                                                                                                |
| <b>17T</b>     | 7,66      | 4,27                        | 4,19                                 | 0,94                        |                                                                                                                                                                |
| <b>18G</b>     | 7,85      | 3,89                        |                                      |                             |                                                                                                                                                                |



**Table S5.** Structure statistics of KIRCONG *i/i+7* NMR conformers in H<sub>2</sub>O/TFE (60/40, v/v).

|                                                |           |
|------------------------------------------------|-----------|
| <b>Residual target function, Å<sup>2</sup></b> | 0.27±0.05 |
| <b>Residual NOE violations</b>                 | 1         |
| Number ≥ 0.1 Å*                                | 0         |
| <b>Residual angle violations</b>               | 0         |
| <b>Atomic pairwise RMSD, Å</b>                 |           |
| Backbone atoms (residues 3-17)                 | 0.53±0.15 |
| Heavy atoms (residues 3-17)                    | 1.03±0.16 |
| <b>Procheck analysis (all residues)#</b>       |           |
| Residues in core regions                       | 49.7%     |
| Residues in allowed regions                    | 35.3%     |
| Residues in generous regions                   | 14.1%     |
| Residues in disallowed regions                 | 0.9%      |

\*CYANA [1] average violations

#PROCHECK\_NMR [2] statistics

## References

1. Herrmann, T.; Guntert, P.; Wuthrich, K. Protein NMR structure determination with automated NOE assignment using the new software CANDID and the torsion angle dynamics algorithm DYANA. *J Mol Biol* **2002**, *319*, 209-227.
2. Laskowski, R.A.; Rullmann, J.A.; MacArthur, M.W.; Kaptein, R.; Thornton, J.M. AQUA and PROCHECK-NMR: programs for checking the quality of protein structures solved by NMR. *J Biomol NMR* **1996**, *8*, 477-486.
